# Supplementary material for: Expression of RINT1 predicts seizure occurrence and outcomes in patients with low-grade gliomas
Source: Springer Nature journal article supplement (doi:10.1007/s00432-014-1827-8), 2014-10-10
Supplement: MOESM1 [file 8519968]

**Supplementary materials**

**Supplementary Table 1** The screened genes in CGGA and TCGA

| Gene name | P-value in CGGA | P-value in TCGA | Function of the gene |
| --- | --- | --- | --- |
| P4HA1 | 0.006 | 0.048 | This gene encodes a component of prolyl 4-hydroxylase, a key enzyme in collagen synthesis composed of two identical alpha subunits and two beta subunits. The encoded protein is one of several different types of alpha subunits and provides the major part of the catalytic site of the active enzyme.[provided by RefSeq, Jul 2008] |
| LPP | 0.008 | 0.033 | The encoded protein localizes to the cell periphery in focal adhesions and may be involved in cell-cell adhesion and cell motility.[provided by RefSeq, Mar 2010] |
| APPL2 | 0.013 | 0.035 | The protein encoded by this gene is one of two effectors of the small GTPase RAB5A/Rab5, which are involved in a signal transduction pathway. A chromosomal aberration t(12;22)(q24.1;q13.3) involving this gene and the PSAP2 gene results in 22q13.3 deletion syndrome, also known as Phelan-McDermid syndrome. [provided by RefSeq, Oct 2011] |
| PDAP1 | 0.034 | 0.029 | Upregulate the PDGFA-stimulated growth of fibroblasts and also downregulate the mitogenicity of PDGFB.[provided by RefSeq, Dec 2010] |
| RINT1 | described in the text | |  |
| LOC202781 | 0.041 | 0.019 | uncharacterized |

**Supplementary Table 2** Univariate predictors of high expression of RINT1

| Characteristics | P-value* |
| --- | --- |
| Seizures | 0.031 |
| Age < 40 yrs | 0.817 |
| Male | 0.159 |
| Cortex involvement | 0.324 |
| Histopathology | 0.538 |

* Results of Chi-square test.

**Supplementary Table 3** Clinical characteristics of LGG patients listed in TCGA

| **Variables** | **Total** | **Seizures** | **No Seizure** | ***p*-value** |
| --- | --- | --- | --- | --- |
| Number | 238 | 146 (61.3) | 92 (38.7) |  |
| Median age (Range) | 41 (14–75) | 41 (14–75) | 40 (20–74) | 0.659a |
| Age ＜40 yrs | 111 (46.6) | 66 (45.2) | 45 (48.9) | 0.577b |
| Gender (Male) | 128 (53.8) | 78 (53.4) | 50 (54.3) | 0.889b |
| Histopathology |  |  |  | 0.287b |
| Oligodendroglioma | 94 (39.5) | 58 (39.7) | 36 (39.1) |  |
| Astrocytoma | 73 (30.6) | 40 (27.3) | 33 (35.8) |  |
| Oligoastrocytoma | 71 (29.8) | 48 (32.9) | 23 (25.0) |  |

aResults of *t*-test

bResults of Chi-square test
